# Supplementary material
Source: MDPI journal article supplement (https://www.mdpi.com/2227-7390/12/1/142)
Supplement: s1 [file s1 › mathematics-2757227-supplementary.pdf]

## Article

# Machine Recognition of DDoS Attacks Using Statistical Parameters

Juraj Smiesko 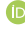, Pavel Segec 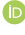 and Martin Kontsek \* 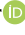

Department of InfoComm Networks, Faculty of Management Science and Informatics, University of Zilina,  
010 26 Zilina, Slovakia

\* Correspondence: martin.kontsek@fri.uniza.sk

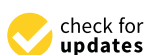

**Citation:** Smiesko, J.; Segec, P.; Kontsek, M. Machine Recognition of DDoS Attacks Using Statistical Parameters. *Mathematics* **2024**, *12*, 142. <https://doi.org/10.3390/math12010142>

Academic Editor: Cheng-Chi Lee

Received: 20 November 2023

Revised: 14 December 2023

Accepted: 22 December 2023

Published: 31 December 2023

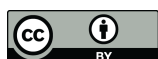

**Copyright:** © 2023 by the authors. Licensee MDPI, Basel, Switzerland. This article is an open access article distributed under the terms and conditions of the Creative Commons Attribution (CC BY) license (<https://creativecommons.org/licenses/by/4.0/>).

## 1. Supplementary material

### 1.1. Coefficient of Variation

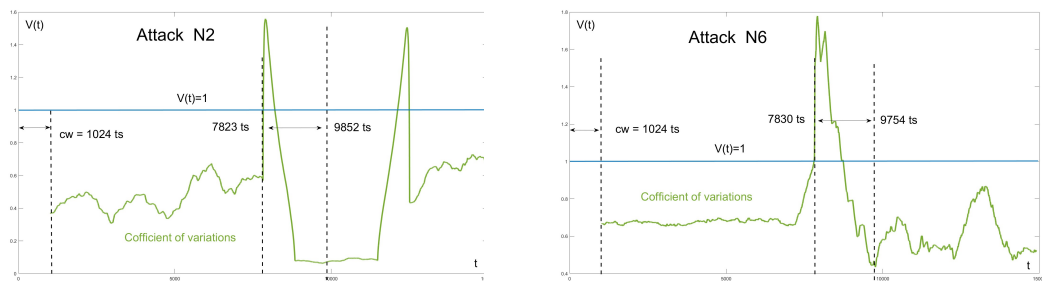

**Figure S1.** Coefficient of Variation - Attack N2, Attack N6.

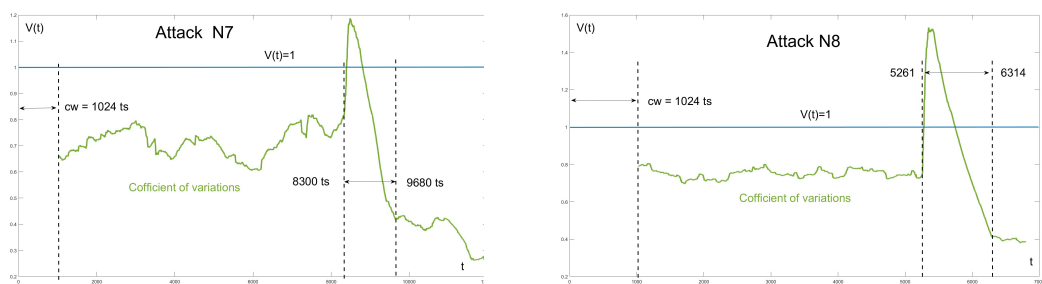

**Figure S2.** Coefficient of Variation - Attack N7, Attack N8.

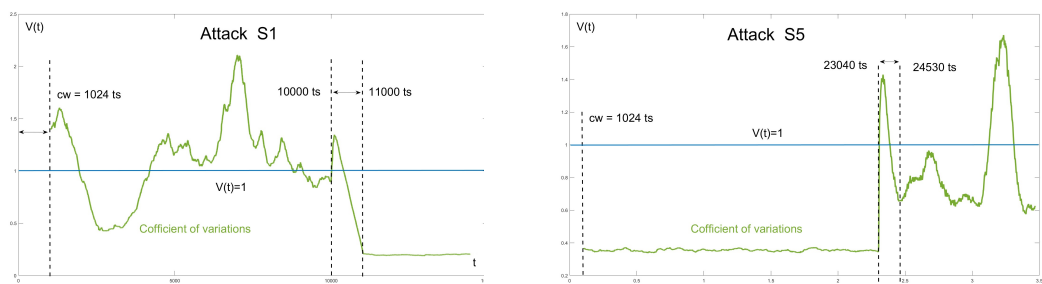

**Figure S3.** Coefficient of Variation - Attack S1, Attack S5.

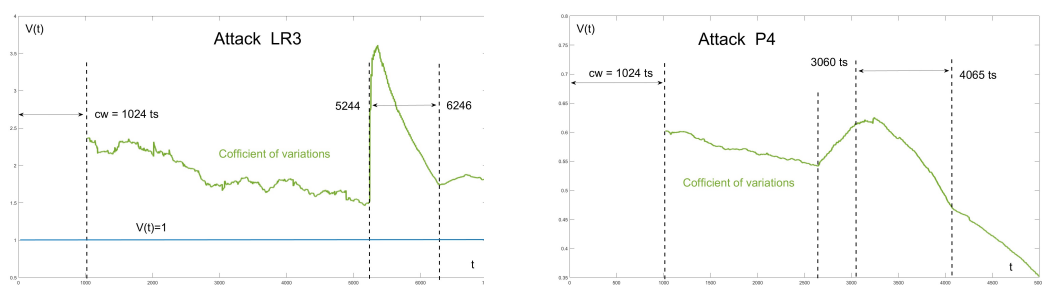

**Figure S4.** Coefficient of Variation - Attack LR3, Attack P4.

## 1.2. Kurtosis coefficient

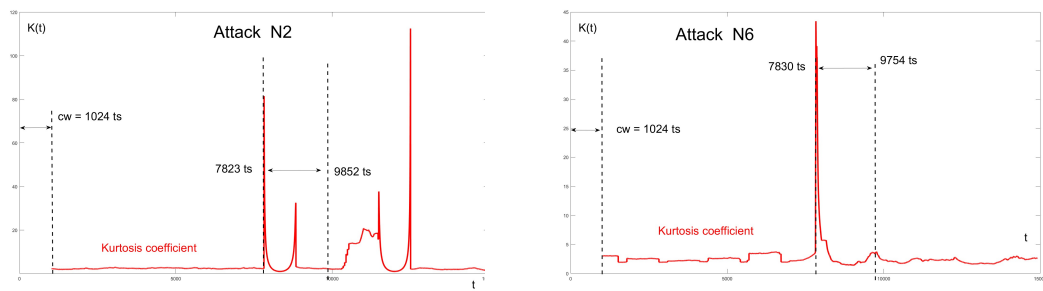

Figure S5. Kurtosis coefficient - Attack N2, Attack N6.

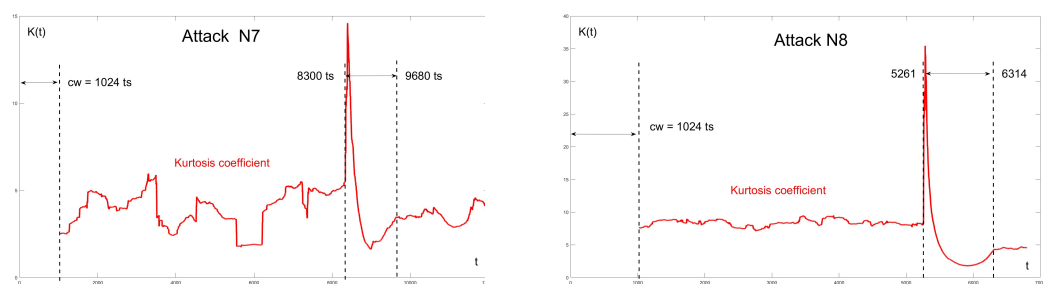

Figure S6. Kurtosis coefficient - Attack N7, Attack N8.

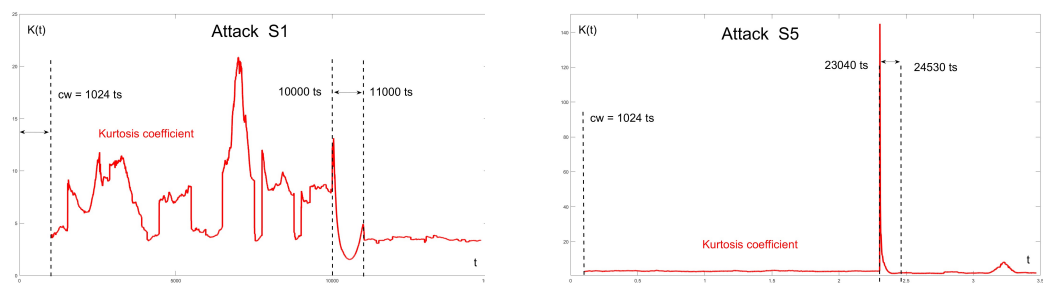

Figure S7. Kurtosis coefficient - Attack S1, Attack S5.

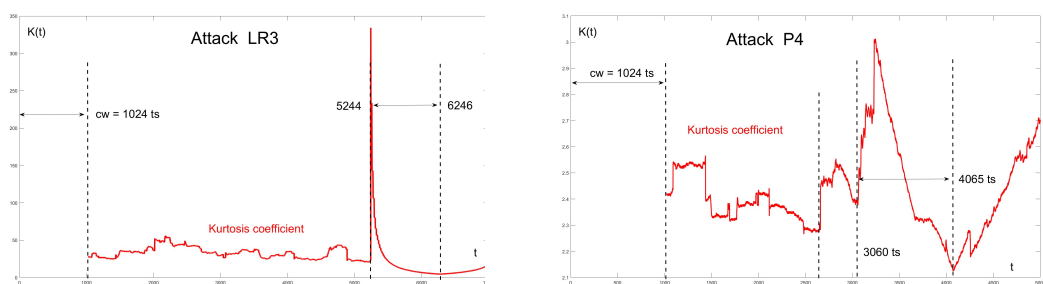

Figure S8. Kurtosis coefficient - Attack LR3, Attack P4.

### 1.3. Skewness coefficient

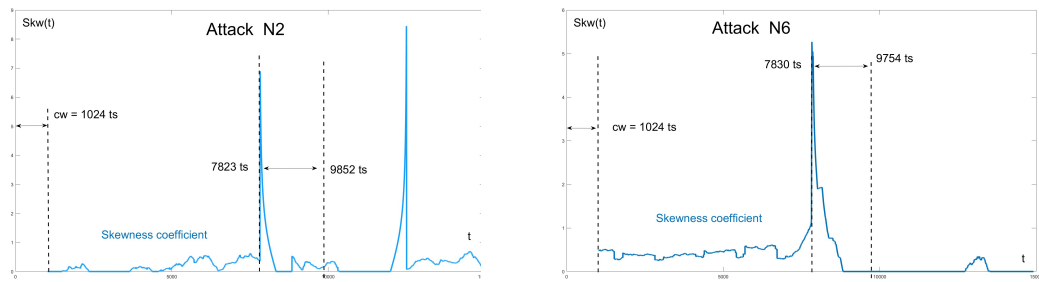

Figure S9. Skewness coefficient - Attack N2, Attack N6.

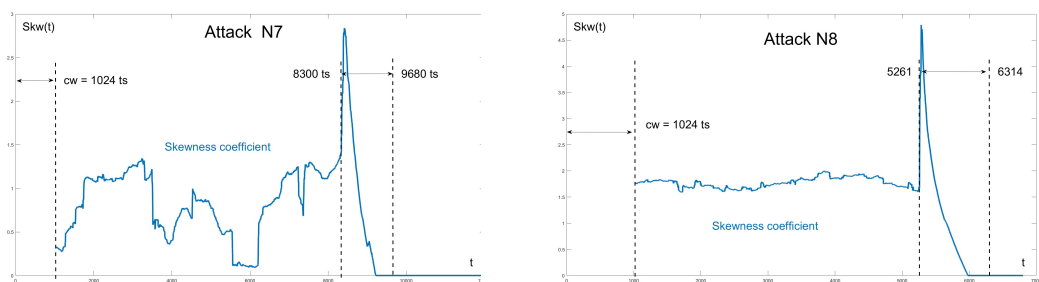

Figure S10. Skewness coefficient - Attack N7, Attack N8.

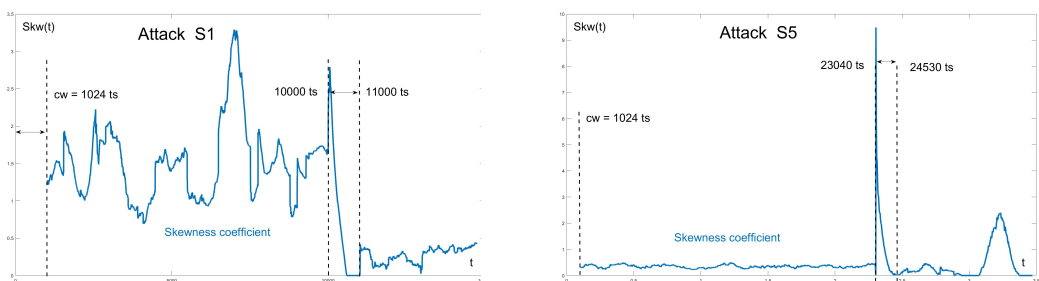

Figure S11. Skewness coefficient - Attack S1, Attack S5.

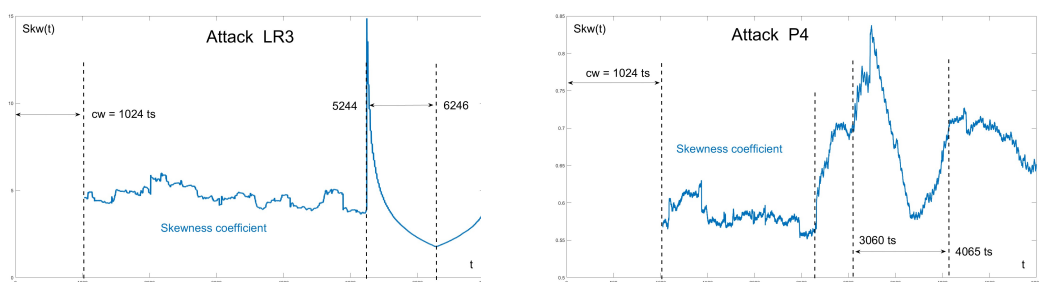

Figure S12. Skewness coefficient - Attack LR3, Attack P4.

## 1.4. Entropy

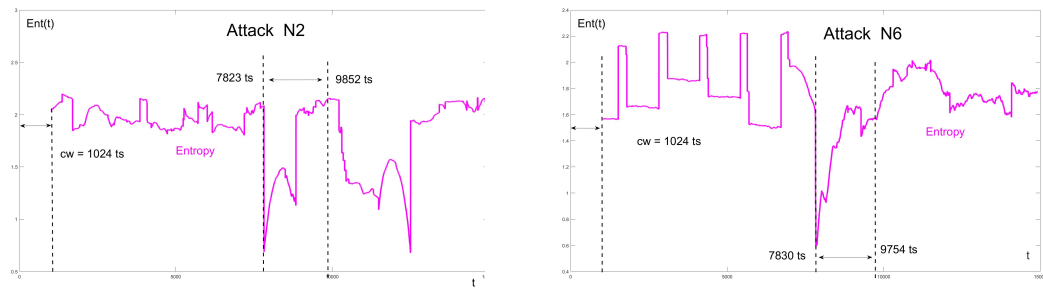

Figure S13. Entropy - Attack N2, Attack N6.

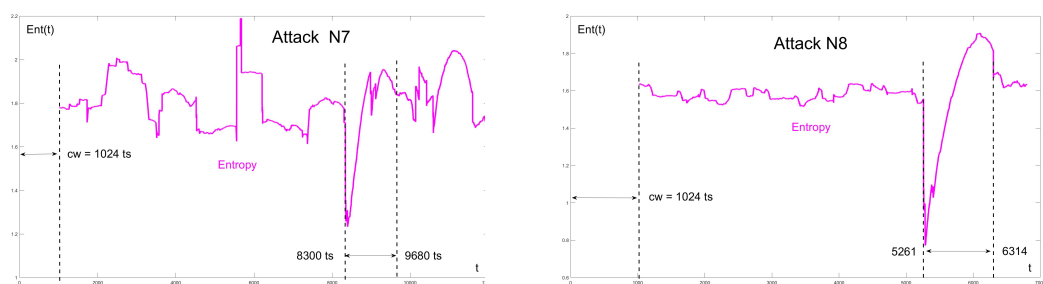

Figure S14. Entropy - Attack N7, Attack N8.

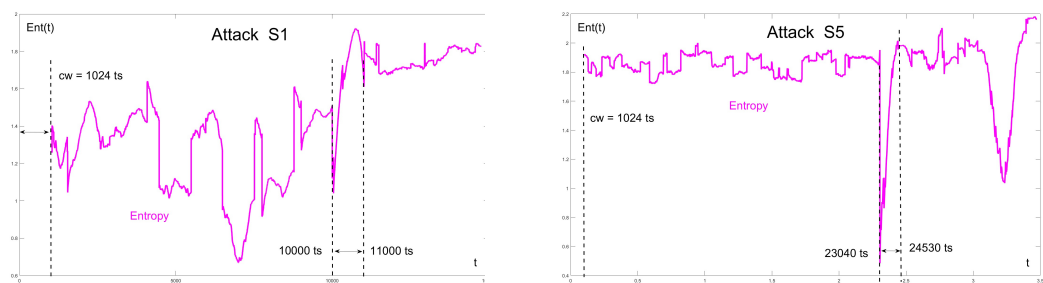

Figure S15. Entropy - Attack S1, Attack S5.

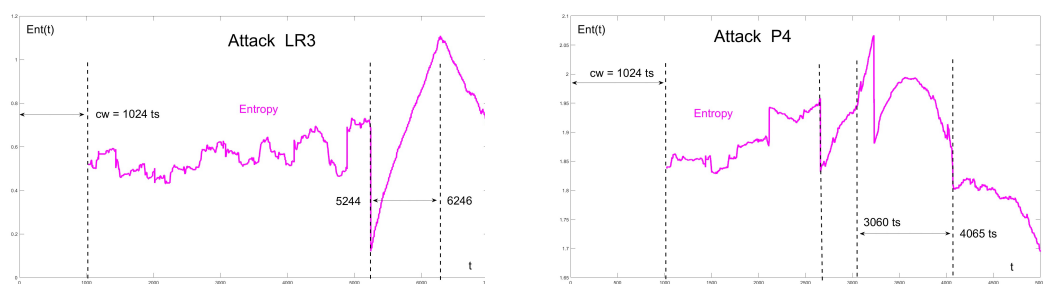

Figure S16. Entropy - Attack LR3, Attack P4.

## 1.5. Hurst exponent

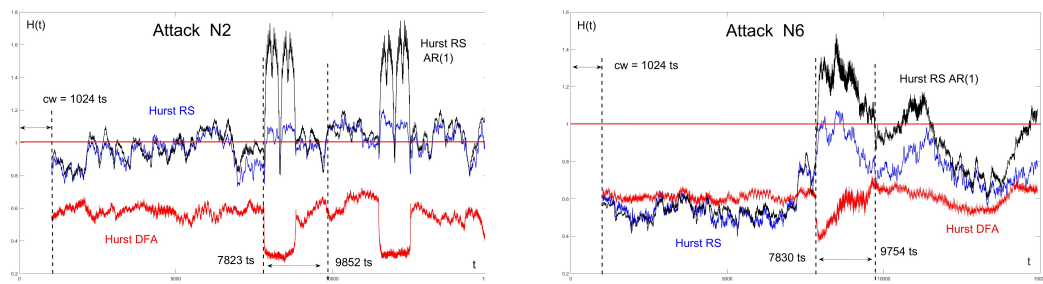

Figure S17. Hurst exponent - Attack N2, Attack N6.

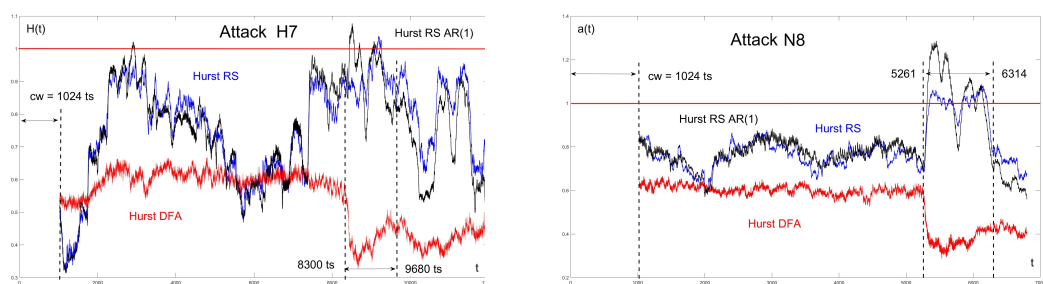

Figure S18. Hurst exponent - Attack N7, Attack N8.

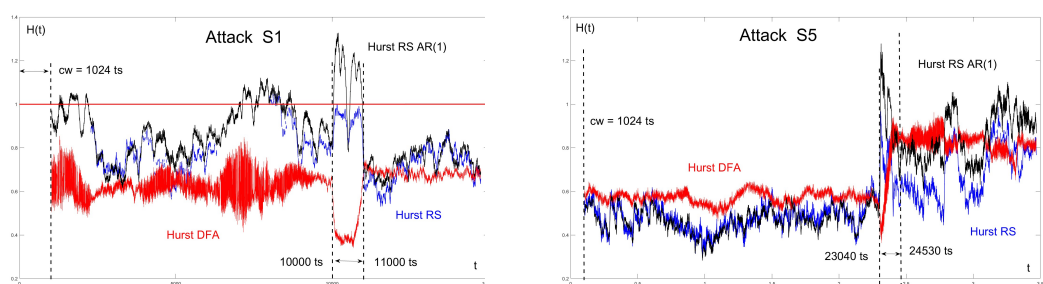

Figure S19. Hurst exponent - Attack S1, Attack S5.

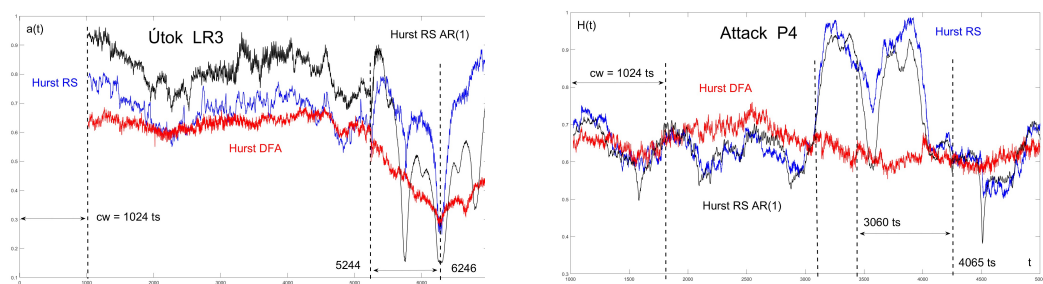

Figure S20. Hurst exponent - Attack LR3, Attack P4.

### 1.6. Autoregression coefficient

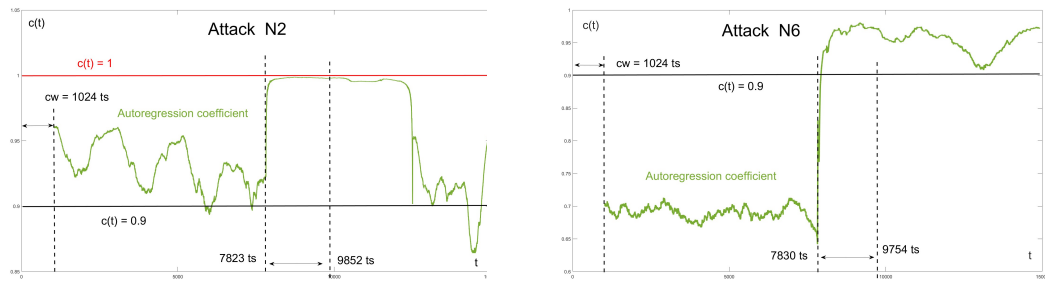

Figure S21. Autoregression coefficient - Attack N2, Attack N6.

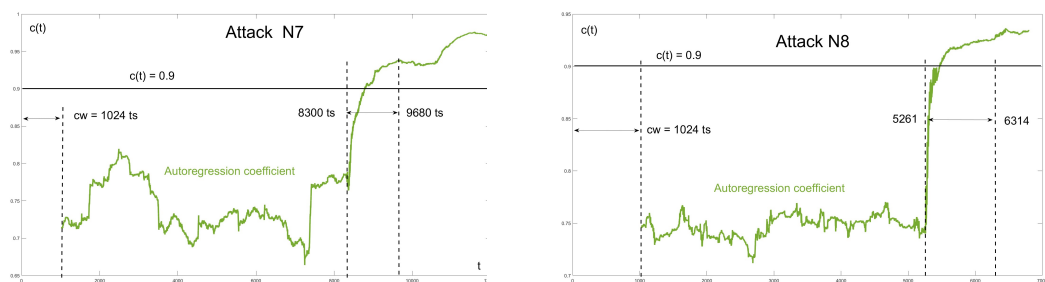

Figure S22. Autoregression coefficient - Attack N7, Attack N8.

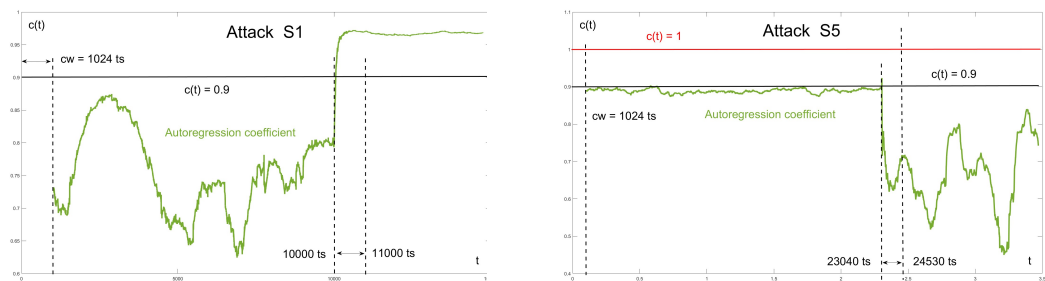

Figure S23. Autoregression coefficient - Attack S1, Attack S5.

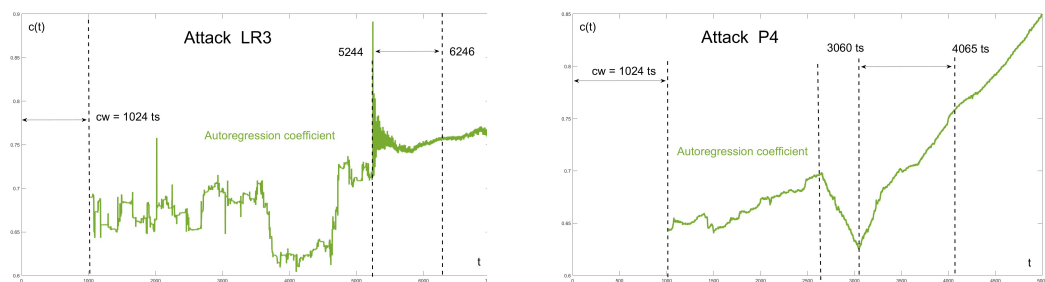

Figure S24. Autoregression coefficient - Attack LR3, Attack P4.

## 1.7. Correlation coefficient

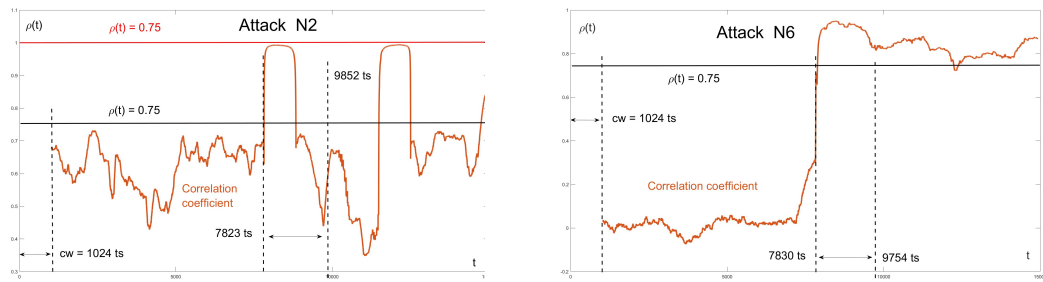

Figure S25. Correlation coefficient - Attack N2, Attack N6.

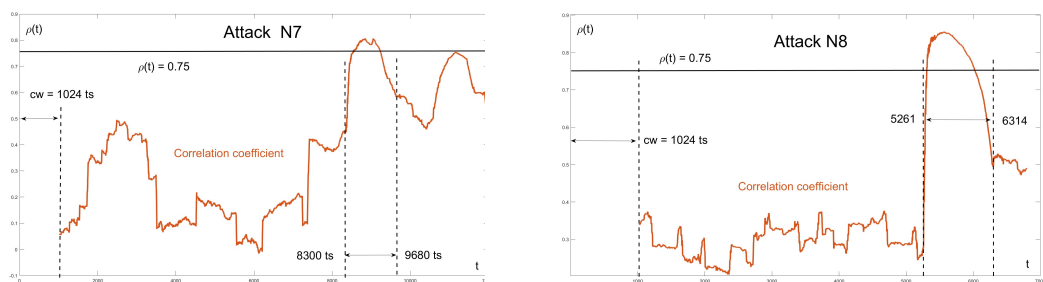

Figure S26. Correlation coefficient - Attack N7, Attack N8.

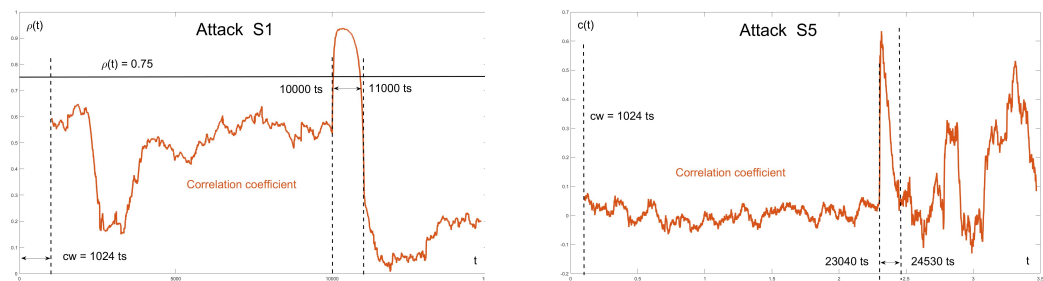

Figure S27. Correlation coefficient - Attack S1, Attack S5.

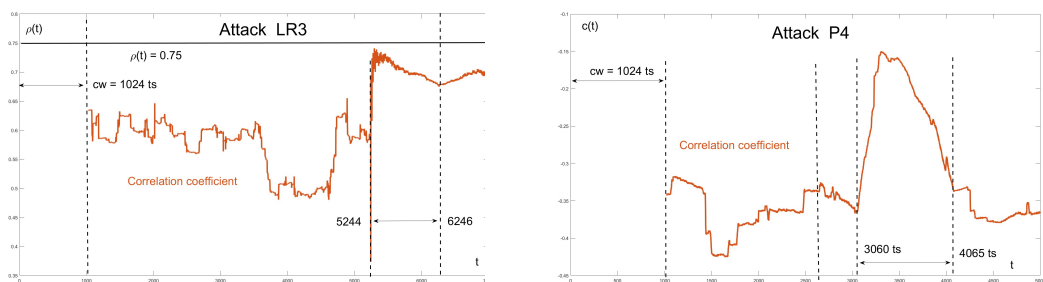

Figure S28. Correlation coefficient - Attack LR3, Attack P4.

## 1.8. Kullback-Leibler divergence

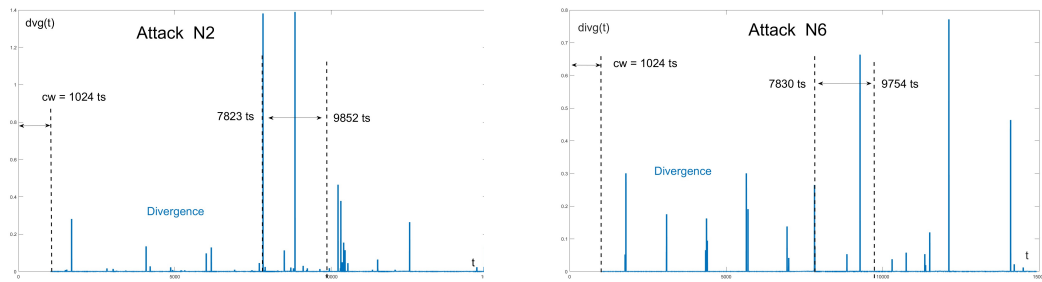

Figure S29. Kullback-Leibler divergence - Attack N2, Attack N6.

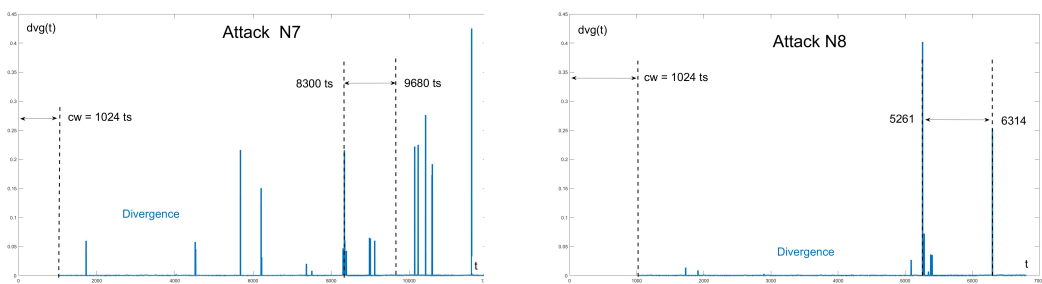

Figure S30. Kullback-Leibler divergence - Attack N7, Attack N8.

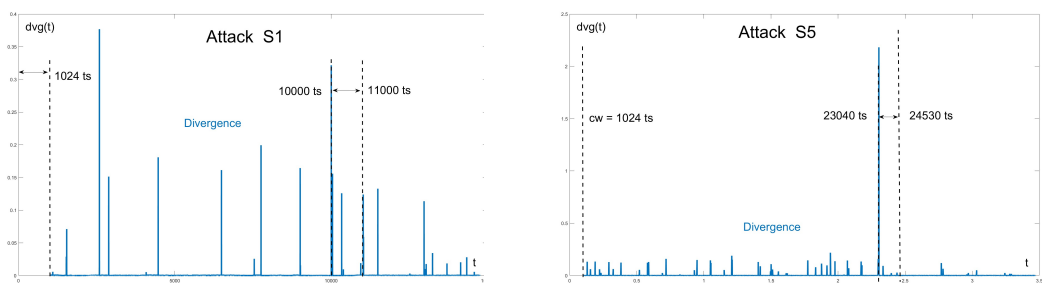

Figure S31. Kullback-Leibler divergence - Attack S1, Attack S5.

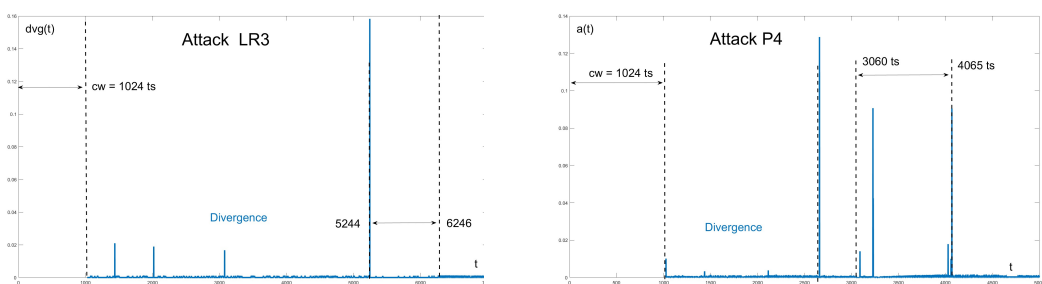

Figure S32. Kullback-Leibler divergence - Attack LR3, Attack P4.
